# Supplementary material
Source: PubMed Central journal article supplement (PMC2993369)
Supplement: 1011499107_pnas.1011499107_SI.pdf [file 1011499107_pnas.1011499107_SI.pdf]

# Supporting Information

Morita et al. 10.1073/pnas.1011499107

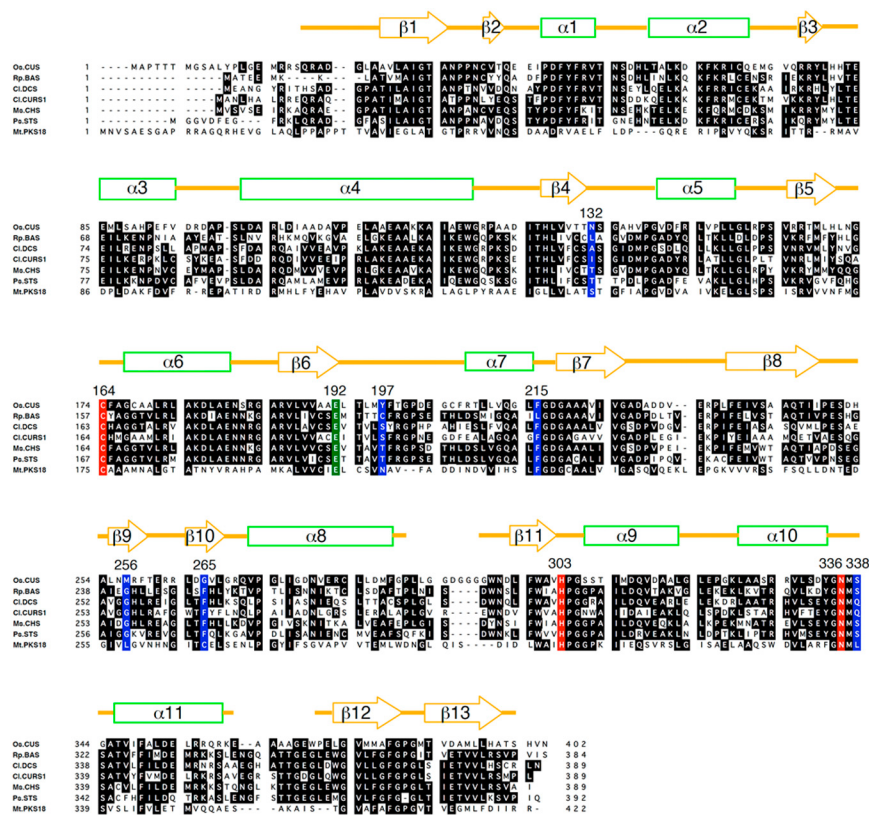

**Fig. S1.** Comparison of the primary sequence of CUS and other type III PKs. The secondary structures of CUS are also delineated:  $\alpha$ -helices (green rectangles),  $\beta$ -strands (orange arrows), and loops (orange, bold lines) are diagrammed. The catalytic triad Cys-His-Asn residues and the residues thought to be crucial for the functional diversity of type III PKs are colored in red and blue, respectively (numbering according to *M. sativa* CHS). The Glu residue involved in the electronic hydrogen bond network in CUS and STS and equivalent residues were colored in green. Abbreviations (GeneBank accession numbers): Os.CUS, *Oryza sativa* CUS (AK109558); Rp.BAS, *Rheum palmatum* BAS (AAK82824); Cl.DCS, *C. longa* DCS (AB495006); Cl.CUR1, *C. longa* CUR1 (AB495007); Ms.CHS, *M. sativa* CHS (Os07-17010.1\_ORYZA); Ps.STS, *Pinus sylvestris* STS (AAB24341); Mt.PKS18, *M. tuberculosis* PKS18 (A70958).

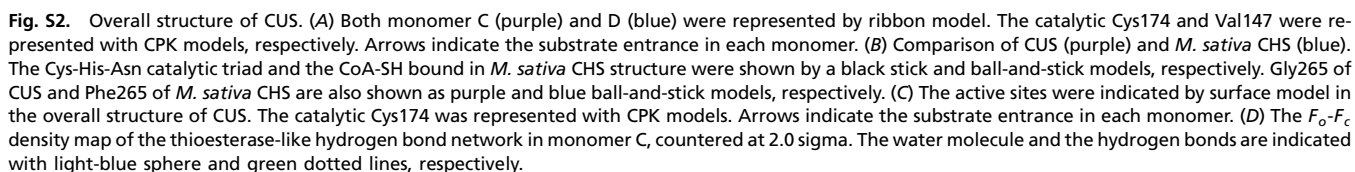

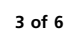

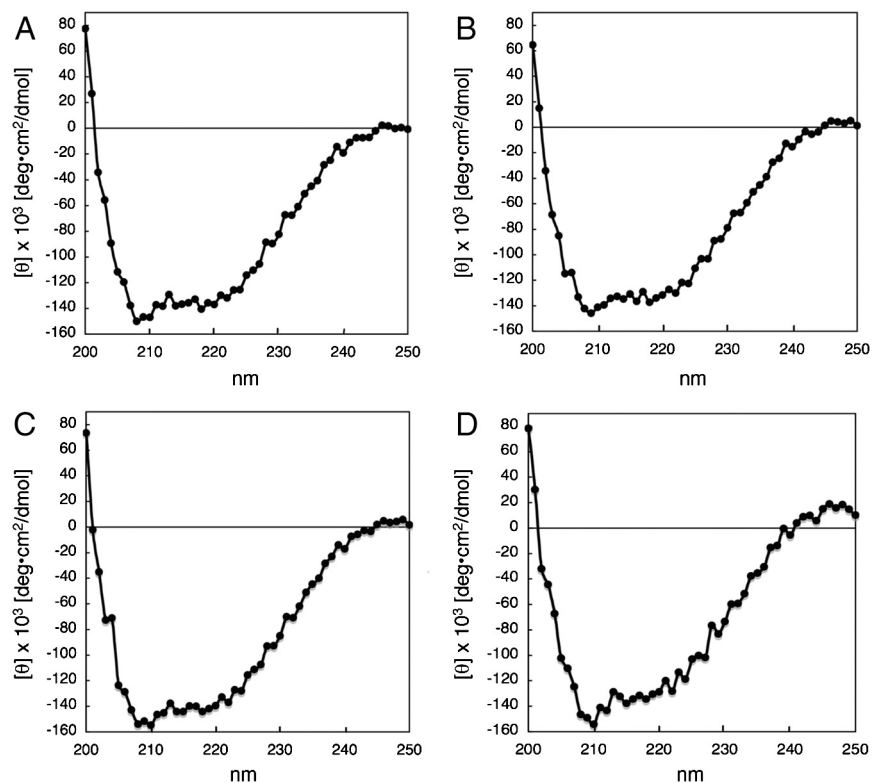

**Fig. S4.** Circular dichroism (CD) spectra of the wild type and its Y207F, M265L, and G274F mutant enzymes. (A) Wild-type CUS. (B) The CUS Y207F. (C) The CUS M265L mutant. (D) The CUS G274F mutant. The CD spectra were recorded at 25 °C with a concentration of 0.22  $\mu$ M protein in 20 mM HEPES-NaOH (pH 7.0), 100 mM NaCl and 0.2 mM DTT, using a SIMAZU AVIV 202 spectrometer with a 1.0-mm path length cell.

Morita et al. [www.pnas.org/cgi/doi/10.1073/pnas.1011499107](http://www.pnas.org/cgi/doi/10.1073/pnas.1011499107)

| Data collection                                     | CUS                  |
|-----------------------------------------------------|----------------------|
| Space group                                         | $P2_1$               |
| Unit-cell                                           |                      |
| $a, b, c$ (Å)                                       | 72.7, 97.2, 126.2    |
| $\alpha, \beta, \gamma$ (°)                         | 90.0, 103.7, 90.0    |
| Resolution (Å)                                      | 50.0–2.5 (2.59–2.50) |
| Unique reflections                                  | 54,813               |
| Redundancy                                          | 3.3 (3.2)            |
| Completeness (%)                                    | 93.0 (88.6)          |
| $\langle I/\sigma(I) \rangle$                       | 21.7 (5.2)           |
| $R_{\text{sym}}$ (%) <sup>*</sup>                   | 8.9 (32.5)           |
| Refinement                                          |                      |
| Resolution (Å)                                      | 2.5                  |
| $R_{\text{cryst}}/R_{\text{free}}$ (%) <sup>†</sup> | 22.1/27.2            |
| No. atoms                                           |                      |
| Protein                                             | 11,098               |
| Water                                               | 125                  |
| Ligand                                              | -                    |
| $B$ -factors (Å <sup>2</sup> )                      |                      |
| Protein                                             | 29.8                 |
| Water                                               | 20.6                 |
| Ligand                                              | -                    |
| R.m.s deviations                                    |                      |
| Bond lengths (Å)                                    | 0.007                |
| Bond angles (°)                                     | 1.5                  |

Values in parentheses are for the highest resolution shell.

\* $R_{\text{sym}} = S_h S_i |I(h)_i - \langle I(h) \rangle| / S_h S_i |I(h)_i|$ , where  $I(h)$  is the intensity of refraction  $h$ ,  $S_h$  is the sum over all reflections, and  $S_i$  is the sum over  $i$  measurements of reflection  $h$ .

<sup>†</sup> $R_{\text{free}}$  was calculated with 5% of data excluded from refinement.
